# Supplementary figures and images for: A new 19-metal-atom cluster [(Me2PhP)10Au12Ag7(NO3)9] with a nearly staggered–staggered M5 ring configuration
Source: Royal Society of Chemistry journal article supplement (doi:10.1039/b503434e), 2005-01-01

Supplementary material.

Fig. 3. TEM image of **1** at  $2 \times 10^5$  magnification.

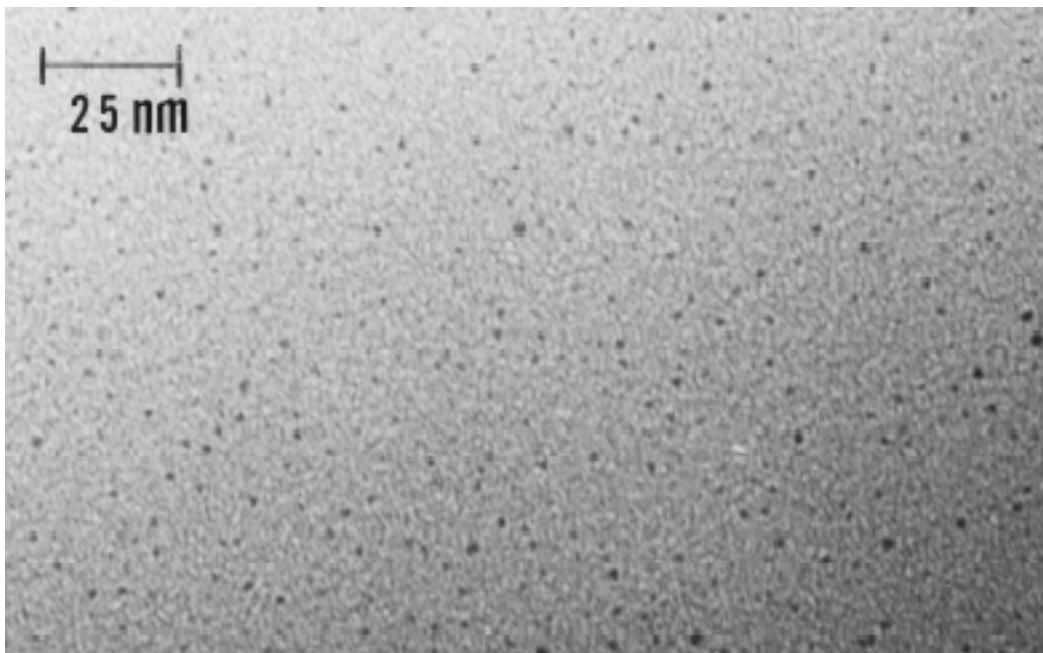

Supplement: b503434e.pdf [file b503434e.pdf]
